## Oral presentations

192

### INTERLEUKIN-6 AND C-REACTIVE PROTEIN PREDICT ALL CAUSE DEATH AND POOR FUNCTIONAL OUTCOME AFTER NON-SEVERE STROKE AND TRANSIENT ISCHAEMIC ATTACK

Sarah Coveney<sup>1,2</sup>, John J. McCabe<sup>1</sup>, Murphy Sean<sup>2,1</sup>, Orina Belton<sup>3</sup>, M. Crowe<sup>4,1</sup>, Eamon Dolan<sup>5,1</sup>, Tim Cassidy<sup>4,1</sup>, Monica De Gaetano<sup>3</sup>, Maria Fitzgibbon<sup>6</sup>, Joe Harbison<sup>2,1</sup>, Gillian Horgan<sup>1</sup>, Michael Marnane<sup>2,1</sup>, Aine Merwick<sup>7</sup>, David Williams<sup>1,7</sup>, P.J. Kelly<sup>2,1</sup>

<sup>1</sup> SCTNI, Dublin, Ireland

<sup>2</sup> J. Stroke Service, Mater University Hospital and University College Dublin, Dublin, Ireland

<sup>3</sup> 3. University College Dublin, Conway Institute, Dublin, Ireland

<sup>4</sup> St Vincent's University Hospital, Dublin, Ireland

<sup>5</sup> James Connolly Memorial Hospital, Dublin, Ireland

<sup>6</sup> Mater Misericordiae University Hospital, Dublin, Ireland

<sup>7</sup> 8. Beaumont University Hospital, Neurology, Dublin, and Royal College of Surgeons in Ireland, Dublin, Ireland

**Background:** Inflammation plays a role in the development of ischaemic cerebrovascular events. High sensitivity C-reactive protein (CRP) is known to predict recurrent events. Little data exists for more upstream serum markers of inflammation.

**Methods:** BIO-STROKE and BIO-TIA were multicentre prospective biomarker and imaging studies of patients with non-severe stroke, TIA and controls. Exclusion criteria were malignancy, infection, recent trauma / surgery, recurrent stroke before phlebotomy/MRI. Serum biomarkers analysed included Interleukin (IL) – 6, CRP, IL-1, IL-8, IL10, IL12p70, IFN and TNF. Plasma CRP and IL-6 were measured by mass spectrometry. Additional biomarkers were measured using ELISA. Follow up was performed at 7, 28, 90 days and 1 year.

**Results:** 680 patients (439 strokes, 241 TIAs) and 68 controls were included in the analysis. The median age was 70 for cases. Carotid stenosis was present in 23.6% of cases. Median CRP was 3.75mg/L, 2.36mg/L and 1.87mg/L in the stroke, TIA and control groups ( $p < 0.001$ ). Median IL-6 was 5.86pg/ml (stroke), 4.25pg/ml (TIA), 3.06pg/ml (control) ( $p < 0.001$ ).

On multivariate cox regression analysis baseline IL6 and CRP were independent predictors of all cause death at 1 year with a HR of 1.005 (95% CI 1.002-1.007,  $p < 0.001$ ). and 1.005 (95% CI 1.002-1.007,  $p < 0.001$ ) per unit increase. Both IL6 and CRP were associated with vascular death at 1 year. In adjusted analyses, IL6 and CRP were associated with poor functional outcome at 1 year (OR of 1.02 (CI 1.01 -1.03) and 1.02 (CI 1.01-1.03) per unit increase, for IL6 and CRP respectively).

On adjusted analysis, when IL6 was analysed as quartiles, there was a strong association with death at 1 year with an OR 1.87 (95% CI 1.19-2.93). CRP, analysed as quartiles, demonstrated an OR for death at 1 year of 1.64 (1.10-2.46).

**Conclusion:** IL-6 and CRP may be a useful prognostic factor for the prediction of outcome and death after stroke at 1 year follow up.
